# Supplementary material
Source: Springer Nature journal article supplement (https://www.springermedizin.de/resource/supplementary/12913_2011_2070_MOESM5_ESM.doc/9529712)
Supplement: MOESM5 [file 9529712]

| **Table 4: Estimated G-study and D-study results . 20 vignettes (v) 42 clinicians (c) within (:) 14 units (u)**  **Estimated G-study variance components (VC)** | | | |
| --- | --- | --- | --- |
| Source | df | VC | % |
| v (vignettes) | 19 | 1.061 | 50.4 |
| u (units or CMHCs) | 13 | .087 | 4.2 |
| c:u (clinicians within unit) | 28 | .029 | 1.4 |
| vu (vignette by unit interaction) | 247 | .16 | 7.6 |
| vc:u (vignette by clinician interaction - within unit) | 532 | .765 | 36.4 |
| Total | 839 | 2.102 | 100 |
| **D-study results for three different designs.** | | | |
| Number of CMHCs (units) | n=1 | n=1 | n=1 |
| Number of clinicians | n=1 | n=2 | n=3 |
| (universe score variance) | 1.061 | 1.061 | 1.061 |
| (relative error variance) | .925 | .543 | .425 |
| (absolute variance) | 1.042 | .645 | .512 |
| (generalizability coefficient: ). | .534 | .661 | .719 |
| (dependability coefficient: ). | .505 | .622 | .674 |
